# Supplementary material
Source: Research Square preprint supplement (doi:10.21203/rs.3.rs-6058846/v1)
Supplement: Supplementary file 2 [file e70c8a649c6f0f8514373004.docx]

**Salpingectomy Simulation**

**Appendix D: Rubrics**

**Objective Structured Assessment of Laparoscopic Salpingectomy Chart (OSA-LS)**

| **OSA-LS Specific Skills** | | | | | |
| --- | --- | --- | --- | --- | --- |
| 1 2 3 4 5 | | | | | |
| Presentation of Anatomic Structures | Poor retraction and exposure of fallopian tube and round ligament |  | Satisfactory retraction and exposure of fallopian tube and round ligament |  | Expert retraction and exposure of fallopian tube and round ligament |
| Use of diathermy | Using diathermy too close to healthy ovarian or other tissue, risk of damage |  | Mostly safe use minimal risk of damage |  | Perfectly safe use of diathermy, no risk of damage |
| Dissection of fallopian tube | Inadequate dissection of fallopian tube. Additional damage or bleeding or part of fallopian tube left *in situ* |  | Identified fallopian tube, adequate dissection little damage of other structures, little bleeding |  | Clearly identified fallopian tube, perfectly dissected, no additional damage, no bleeding. Fallopian tube completely removed |
| Care for ovary, ovary artery and pelvic wall | Using diathermy or cutting too close to ovarian artery high risk of bleeding or occlusion of vessel or cauterizing ovary |  | Mostly safe use of instruments, low risk of arterial damage, little cauterizing on ovary |  | Perfectly safe use of instruments, no risk of cauterizing or cutting the ovary, ovarian artery or other non-target tissue |
| Extraction of fallopian tube* | Clumsily performed with major difficulty to catch the tissue, retract or get the tissue in the bag |  | Minor difficulty retracting or getting the tissue in the bag |  | Perfect retraction grasps end of structure or, easy placement of tube in bag |
| *Omitted from this study due focus exercise on tubal excision and minimize additional cost and waste with use of specimen retrieval bags.  *Reference: Larsen CR et al. Objective assessment of surgical competence in gynaecological laparoscopy: development and validation of a procedure-specific rating scale. BJOG. 2008 Jun;115(7):908-16* | | | | | |

**Global Operative Assessment of Laparoscopic Skills (GOALS)**

| **Domains** | | | | | |
| --- | --- | --- | --- | --- | --- |
|  | 1 2 3 4 5 | | | | |
| Depth Perception | Constantly overshoots target, wide swings, slow to correct |  | Some overshooting or missing of target, but quick to correct |  | Accurately directs instruments in the correct plane to target |
| Bimanual Dexterity | Uses only one hand, ignores nondominant hand, poor coordination between hands |  | Uses both hands but does not optimize interaction between hands |  | Expertly uses both hands in a complimentary manner to provide optimal exposure |
| Efficiency | Uncertain, inefficient efforts; many tentative movements; constantly changing focus or persisting without progress |  | Slow, but planned movements are reasonably organized |  | Confident, efficient and safe conduct, maintains focus on task until it is better performed by way of an alternative approach |
| Tissue Handling | Rough movements, tears tissues, injures adjacent structures, poor grasper control, grasper frequently slips |  | Handles tissue reasonably well, minor trauma to adjacent tissue (ie, occasional unnecessary bleeding or slipping of the grasper) |  | Handles tissues well, applies appropriate traction, negligible injury to adjacent structures |
| Autonomy* | Unable to complete entire task, even with verbal guidance |  | Able to complete task safely with moderate guidance |  | Able to complete task independently without prompting |
| *Omitted from this study due to absence of verbal guidance or prompting  *Reference: Vassiliou MC et al. A global assessment tool for evaluation of intraoperative laparoscopic skills. Am J Surg. 2005 Jul;190(1):107-13* | | | | | |
